# Supplementary material
Source: ML conference proceedings conference paper supplement (https://proceedings.mlr.press/v161/pratap21a.html)
Supplement: Supplementary file 1 [file pratap21a-supp.pdf]

---

# Variance Reduction in Frequency Estimators via Control Variates Method (Supplementary Materials)

---

Rameshwar Pratap<sup>1</sup>

Raghav Kulkarni<sup>2</sup>

<sup>1</sup>Indian Institute of Technology (IIT), Mandi H.P., India.

<sup>2</sup>Chennai Mathematical Institute (CMI) Chennai, India.

## A MISSING PROOFS:

### PROOF OF THEOREM 5:

*Proof.* We restate the the random variable  $X$  is as follows:  $X = \sum_{j \in [n]} f_j Y_j$ , where  $Y_j$  denotes an indicator random variable of the event “ $h(j) = h(a)$ ” for  $j \in [n]$ . By 2-universality of the family from which  $h$  is drawn we have  $\mathbb{E}[Y_j] = 1/k$ . Thus, by linearity of expectation we have

$$\begin{aligned} \mathbb{E}[X] &= \mathbb{E} \left[ f_a + \sum_{j \in [n]/\{a\}} f_j Y_j \right]. \\ &= f_a + \sum_{j \in [n]/\{a\}} \frac{f_j}{k} = f_a + \frac{\|\mathbf{f}\|_1 - f_a}{k}, \end{aligned} \quad (1)$$

where  $\|\mathbf{f}\|_1 = \sum_{i \in [n]} f_i$ . We now calculate the variance of the random variable  $X$ .

$$\begin{aligned} \text{Var}[X] &= \text{Var} \left( f_a + \sum_{j \in [n]/\{a\}} f_j Y_j \right). \\ &= \text{Var} \left( \sum_{j \in [n]/\{a\}} f_j Y_j \right). \end{aligned} \quad (2)$$

$$= \sum_{j \in [n]/\{a\}} \text{Var}[f_j Y_j] + \sum_{i \neq j, i, j \in [n]/\{a\}} \text{Cov}[f_i Y_i, f_j Y_j]. \quad (3)$$

$$= \sum_{j \in [n]/\{a\}} (\mathbb{E}[f_j^2 Y_j^2] - \mathbb{E}[f_j Y_j]^2) + \sum_{i \neq j, i, j \in [n]/\{a\}} (\mathbb{E}[f_i Y_i f_j Y_j] - \mathbb{E}[f_i Y_i] \mathbb{E}[f_j Y_j]).$$

$$= \sum_{j \in [n]/\{a\}} f_j^2 (\mathbb{E}[Y_j] - \mathbb{E}[Y_j]^2) + \sum_{i \neq j, i, j \in [n]/\{a\}} f_i f_j (\mathbb{E}[Y_i Y_j] - \mathbb{E}[Y_i] \mathbb{E}[Y_j]).$$

$$= \sum_{j \in [n]/\{a\}} f_j^2 \left( \frac{1}{k} - \frac{1}{k^2} \right) + \sum_{i \neq j, i, j \in [n]/\{a\}} f_i f_j \left( \frac{1}{k^2} - \frac{1}{k^2} \right). \quad (4)$$

$$= \left( \frac{1}{k} - \frac{1}{k^2} \right) \sum_{j \in [n]/\{a\}} f_j^2 + 0.$$

$$= \frac{\|\mathbf{f}\|_2^2 - f_a^2}{k} \left( 1 - \frac{1}{k} \right). \quad (5)$$

Equations (2), and (3) hold due to Fact 4. Equation (4) holds as  $h(\cdot)$  is 2-universal hash function, which gives  $\mathbb{E}[Y_i Y_j] = \mathbb{E}[Y_i] \mathbb{E}[Y_j] = 1/k^2$ . Equations (1), and 5 complete a proof of the theorem.  $\square$

### PROOF OF THEOREM 6:

*Proof.* We recall our random variable for our estimate as follows:

$$\begin{aligned} X &= g(a) \sum_{j=1}^n f_j g(j) Y_j. \\ &= g(a)^2 f_a Y_a + \sum_{j \in [n]/\{a\}} f_j g(a) g(j) Y_j. \end{aligned} \quad (6)$$

$$= f_a + g(a) \sum_{j \in [n]/\{a\}} f_j g(j) Y_j. \quad (7)$$

For each  $j \in [n]/\{a\}$  we have the following two equalities, which we will repeatedly use.

$$\begin{aligned} \mathbb{E}[g(j)] &= 0, \\ \mathbb{E}[Y_j^2] &= \mathbb{E}[Y_j] = \Pr[h(j) = h(a)] = 1/k. \end{aligned} \quad (8)$$

Equation (8) holds as  $g(\cdot)$  is from 2-universal family and can take sign between  $\{-1, +1\}$  each with probability  $1/2$ . Equation (8) holds since  $g$  and  $h$  are independent. Thus, we have

$$\mathbb{E}[g(j) Y_j] = \mathbb{E}[g(j)] \mathbb{E}[Y_j] = 0 \times \mathbb{E}[Y_j] = 0. \quad (9)$$

Due to Equations (7),(9), we have

$$\mathbb{E}[X] = f_a + g(a) \sum_{j \in [n]/\{a\}} f_j \mathbb{E}[g(j) Y_j] = f_a. \quad (10)$$

Thus, the output  $X = \hat{f}_a$  is an unbiased estimator for the desired frequency  $f_a$ . We now give a variance analysis on the estimate.

$$\begin{aligned} \text{Var}[X] &= \text{Var} \left[ f_a + \sum_{j \in [n]/\{a\}} f_j g(a) g(j) Y_j \right]. \\ &= \text{Var} \left[ \sum_{j \in [n]/\{a\}} f_j g(a) g(j) Y_j \right]. \end{aligned} \quad (11)$$

$$\begin{aligned} &= g(a)^2 \text{Var} \left[ \sum_{j \in [n]/\{a\}} f_j g(j) Y_j \right]. \\ &= \text{Var} \left[ \sum_{j \in [n]/\{a\}} f_j g(j) Y_j \right]. \end{aligned} \quad (12)$$

$$\begin{aligned} &= \mathbb{E} \left[ \left( \sum_{j \in [n]/\{a\}} f_j g(j) Y_j \right)^2 \right] - \mathbb{E} \left[ \sum_{j \in [n]/\{a\}} f_j g(j) Y_j \right]^2. \\ &= \mathbb{E} \left[ \left( \sum_{j \in [n]/\{a\}} f_j g(j) Y_j \right)^2 \right] \\ &= \mathbb{E} \left[ \sum_{j \in [n]/\{a\}} f_j^2 g(j)^2 Y_j^2 + \sum_{j \neq l} f_j f_l g(j) g(l) Y_j Y_l \right]. \end{aligned} \quad (13)$$

$$= \mathbb{E} \left[ \sum_{j \in [n] \setminus \{a\}} f_j^2 Y_j \right] = \sum_{j \in [n] \setminus \{a\}} \frac{f_j^2}{k} = \frac{\|\mathbf{f}\|_2^2 - f_a^2}{k}. \quad (14)$$

Equation (11) and (12) hold due to Fact 4, and  $g(a)^2 = 1$ . Equation (13) hold due to Equation (8). Equations (10) and (14) completes a proof of the theorem.  $\square$

### PROOF OF COROLLARY 7:

*Proof.* The random variable  $X$  mentioned in Theorem 5 captures the estimated frequency (an overestimate indeed). Due to Theorem 5, we have  $\mathbb{E}[X] = f_a + \frac{\|\mathbf{f}\|_1 - f_a}{k}$ , and  $\text{Var}[X] = \frac{\|\mathbf{f}\|_2^2 - f_a^2}{k} \left(1 - \frac{1}{k}\right)$ . For a random variable  $R$  with mean  $\mathbb{E}[R]$  and variance  $\text{Var}[R]$  satisfies the following concentration guarantee

$$\Pr \left[ |R - \mathbb{E}[R]| \geq \epsilon' \sqrt{\text{Var}[R]} \right] \leq \frac{1}{\epsilon'^2}.$$

We obtain the following by putting  $R$  as our random variance  $X$ , and  $\epsilon' = \frac{\epsilon \sqrt{\|\mathbf{f}\|_2^2 - f_a^2}}{\sqrt{\text{Var}[X]}}$  in the above equation.

$$\begin{aligned} \Pr \left[ \left| \hat{f}_a - \left( f_a + \frac{\|\mathbf{f}\|_1 - f_a}{k} \right) \right| \geq \epsilon \sqrt{\|\mathbf{f}\|_2^2 - f_a^2} \right] &\leq \frac{k-1}{\epsilon^2 k^2} \\ &\leq \frac{1}{\epsilon^2 k} = \frac{1}{3}. \end{aligned}$$

The last equality holds due to our choice of the parameter  $k$ . Due to Theorem 1, the variance of our CV estimator is given as follows:

$$\text{Var}(X + \hat{c}(Z - \mathbb{E}[Z])) = \text{Var}(X) - \frac{(\|\mathbf{f}\|_1 - f_a)^2}{(n-1)k} \left(1 - \frac{1}{k}\right). \quad (15)$$

$$= \left( \frac{\|\mathbf{f}\|_2^2 - f_a^2}{k} - \frac{(\|\mathbf{f}\|_1 - f_a)^2}{(n-1)k} \right) \cdot \left(1 - \frac{1}{k}\right). \quad (16)$$

$$= \left( \frac{(n-1)(\|\mathbf{f}\|_2^2 - f_a^2) - (\|\mathbf{f}\|_1 - f_a)^2}{(n-1)k} \right) \cdot \left(1 - \frac{1}{k}\right). \quad (17)$$

Further, due to Chebyshev's inequality, for the query item  $a$  its estimated frequency  $\tilde{f}_a$  outputted by our CV estimate satisfies the following:

$$\Pr \left[ \left| \tilde{f}_a - \left( f_a + \frac{\|\mathbf{f}\|_1 - f_a}{k} \right) \right| \geq \epsilon \sqrt{\|\mathbf{f}\|_2^2 - f_a^2} \right] \leq \frac{\text{Var}(X + \hat{c}(Z - \mathbb{E}[Z]))}{\epsilon^2 (\|\mathbf{f}\|_2^2 - f_a^2)}. \quad (18)$$

$$= \left( \frac{(n-1)(\|\mathbf{f}\|_2^2 - f_a^2) - (\|\mathbf{f}\|_1 - f_a)^2}{\epsilon^2 k (n-1) (\|\mathbf{f}\|_2^2 - f_a^2)} \right) \cdot \left(1 - \frac{1}{k}\right). \quad (19)$$

$$\leq \frac{(n-1)(\|\mathbf{f}\|_2^2 - f_a^2) - (\|\mathbf{f}\|_1 - f_a)^2}{\epsilon^2 k (n-1) (\|\mathbf{f}\|_2^2 - f_a^2)}. \quad (20)$$

$$= \frac{1}{3}. \quad (21)$$

The last equality follows by putting

$$k = \frac{3}{\epsilon^2} \cdot \left( \frac{(n-1)(\|\mathbf{f}\|_2^2 - f_a^2) - (\|\mathbf{f}\|_1 - f_a)^2}{(n-1)(\|\mathbf{f}\|_2^2 - f_a^2)} \right),$$

in Equation (21).  $\square$

**PROOF OF COROLLARY 8:**

*Proof.* The random variable  $X$  mentioned in Theorem 6 captures the estimated frequency. Due to Theorem 6, we have

$$\mathbb{E}[X] = f_a, \text{ and } \text{Var}[X] = \frac{\|\mathbf{f}\|_2^2 - f_a^2}{k}.$$

We now apply Chebyshev's inequality on the above expression which gives us the desired concentration guarantee

$$\begin{aligned} \Pr \left[ |\hat{f}_a - f_a| \geq \varepsilon \sqrt{\|\mathbf{f}\|_2^2 - f_a^2} \right] &= \Pr \left[ |X - \mathbb{E}[X]| \geq \varepsilon \sqrt{\|\mathbf{f}\|_2^2 - f_a^2} \right] \\ &\leq \frac{\text{Var}[X]}{\varepsilon^2 (\|\mathbf{f}\|_2^2 - f_a^2)} \\ &= \frac{1}{k\varepsilon^2} = \frac{1}{3}. \end{aligned}$$

The last equality holds due to our choice of the parameter  $k$ . Due to Theorem 2, the variance of our CV estimator is given as follows:

$$\text{Var}(X + \hat{c}(Z - \mathbb{E}[Z])) = \text{Var}(X) - \frac{(\|\mathbf{f}\|_1 - f_a)^2}{(n-1)k}. \quad (22)$$

$$= \frac{\|\mathbf{f}\|_2^2 - f_a^2}{k} - \frac{(\|\mathbf{f}\|_1 - f_a)^2}{(n-1)k}. \quad (23)$$

$$= \frac{(n-1)(\|\mathbf{f}\|_2^2 - f_a^2) - (\|\mathbf{f}\|_1 - f_a)^2}{(n-1)k}. \quad (24)$$

The equality follows after some simple algebraic calculations. Further, due to Chebyshev's inequality, for the query item  $a$  its estimated frequency  $\tilde{f}_a$  outputted by CV satisfies the following:

$$\Pr \left[ |\tilde{f}_a - f_a| \geq \varepsilon \sqrt{\|\mathbf{f}\|_2^2 - f_a^2} \right] \leq \frac{\text{Var}(X + \hat{c}(Z - \mathbb{E}[Z]))}{\varepsilon^2 (\|\mathbf{f}\|_2^2 - f_a^2)}. \quad (25)$$

$$= \frac{(n-1)(\|\mathbf{f}\|_2^2 - f_a^2) - (\|\mathbf{f}\|_1 - f_a)^2}{\varepsilon^2 k (n-1) (\|\mathbf{f}\|_2^2 - f_a^2)}. \quad (26)$$

$$= \frac{1}{3}. \quad (27)$$

The last equality follows by putting

$$k = \frac{3}{\varepsilon^2} \cdot \left( \frac{(n-1)(\|\mathbf{f}\|_2^2 - f_a^2) - (\|\mathbf{f}\|_1 - f_a)^2}{(n-1)(\|\mathbf{f}\|_2^2 - f_a^2)} \right).$$

in Equation (27). □
